# Supplementary material for: The association between fibrinogen levels and severity of coronary artery disease and long-term prognosis following percutaneous coronary intervention in patients with type 2 diabetes mellitus
Source: PubMed Central journal article supplement (PMC10716187; doi:10.3389/fendo.2023.1287855), 2023-11-29
Supplement: DataSheet_1.pdf [file DataSheet_1.pdf]

## *Supplementary Material*

### 1 Supplementary Data

The supplementary Material comprises five tables and a composite figure.

### 2 Supplementary Figures and Tables

**Table S1: Baseline characteristics according to fibrinogen level (Median (IQR))**

| Variables                          | Fibrinogen $\leq$ 3.79g/l, n=312 | Fibrinogen $>$ 3.79g/l, n=228 | P      |
|------------------------------------|----------------------------------|-------------------------------|--------|
| Male, n (%)                        | 213(68.3)                        | 150(65.8)                     | 0.544  |
| Age, years                         | 69(61.76)                        | 70(62.77)                     | 0.583  |
| Hypertension, n (%)                | 229(73.4)                        | 172(75.4)                     | 0.592  |
| Previous PCI, n (%)                | 34(10.9)                         | 20(8.8)                       | 0.416  |
| Previous heart failure, n (%)      | 15(4.8)                          | 11(4.8)                       | 0.993  |
| COPD, n (%)                        | 7(2.2)                           | 8(3.5)                        | 0.377  |
| Previous stroke, n (%)             | 12(3.8)                          | 20(8.8)                       | 0.017  |
| peripheral arterial disease, n (%) | 3(1.0)                           | 4(1.8)                        | 0.421  |
| Chronic kidney disease, n (%)      | 5(1.6)                           | 20(8.8)                       | <0.001 |
| Smoking, n (%)                     | 139(44.6)                        | 105(46.1)                     | 0.972  |
| SBP, mmHg                          | 133(121,148)                     | 133(117.50,147.50)            | 0.564  |
| DBP, mmHg                          | 76(67.75,84.25)                  | 77(68.00,86.75)               | 0.474  |
| Heart rate, bpm                    | 76(67,86)                        | 80(71,90)                     | 0.001  |
| Troponin-T, pg/ml                  | 21.00(11.14,177.73)              | 101.80(21.80,1050.60)         | <0.001 |
| BNP, pg/ml                         | 81.10(33.38,202.55)              | 214.45(66.00,711.10)          | <0.001 |
| Creatinine, umol/l                 | 73.70(63.13,89.98)               | 83.50(67.30,109.10)           | <0.001 |
| Uric acid, umol/l                  | 362.45(296.05,433.20)            | 384.10(302.90,457.40)         | 0.083  |
| Cystatin c, mg/l                   | 1.13(0.96,1.36)                  | 1.34(1.06,1.74)               | <0.001 |
| FBG, mmol/l                        | 7.48(5.93,10.03)                 | 8.25(6.64,11.64)              | 0.002  |

Continue Table S1

|                                     |                       |                       |        |
|-------------------------------------|-----------------------|-----------------------|--------|
| HbA1c, mmol/l                       | 7.40(6.70,8.60)       | 7.70(6.70,9.20)       | 0.129  |
| Triglycerides, mmol/l               | 1.63(1.14,2.41)       | 1.57(1.13,2.33)       | 0.783  |
| Cholesterol, mmol/l                 | 4.13(3.46,4.93)       | 4.37(3.51,5.24)       | 0.102  |
| HDL-C, mmol/l                       | 1.10(0.93,1.27)       | 1.10(0.91,1.31)       | 0.487  |
| LDL-C, mmol/l                       | 2.50(1.93,3.08)       | 2.67(2.07,3.28)       | 0.082  |
| Residual cholesterol, mmol/l        | 0.54(0.35,0.75)       | 0.57(0.39,0.81)       | 0.159  |
| Lipoprotein(a), mg/l                | 76.80(42.40,192.55)   | 129.90(72.35,326.30)  | <0.001 |
| Apo(A), mmol/l                      | 1.22(1.07,1.38)       | 1.19(1.00,1.37)       | 0.061  |
| Apo(B), mmol/l                      | 0.79(0.61,1.02)       | 0.85(0.68,1.07)       | 0.024  |
| Homocysteine, umol/l                | 13.10(10.60,17.60)    | 13.70(10.43,19.28)    | 0.373  |
| Albumin, g/l                        | 40.10(37.30,42.70)    | 38.90(35.25,41.73)    | <0.001 |
| AST, IU/l                           | 24.10(17.60,44.43)    | 25.70(18.30,40.30)    | 0.647  |
| ALT, IU/l                           | 24.65(17.73,41.63)    | 25.70(16.70,40.05)    | 0.756  |
| Direct bilirubin, umol/l            | 2.68(1.99,3.64)       | 2.55(1.89,3.80)       | 0.600  |
| Indirect bilirubin, umol/l          | 9.78(7.56,12.82)      | 9.65(7.13,12.73)      | 0.254  |
| D-dimer, mg/l                       | 0.30(0.18,0.50)       | 0.52(0.29,0.94)       | <0.001 |
| PT, s                               | 13.65(12.50,16.80)    | 13.85(12.50,16.20)    | 0.296  |
| INR                                 | 0.95(0.91,1.00)       | 0.95(0.91,1.02)       | 0.754  |
| APTT, s                             | 37.60(34.50,40.40)    | 38.10(35.00,41.80)    | 0.086  |
| RBC count, *10 <sup>12</sup> /l     | 4.41(4.00,4.75)       | 4.26(3.83,4.65)       | 0.003  |
| Hemoglobin, g/l                     | 135.00(123.00,147.25) | 129.00(116.00,143.00) | <0.001 |
| WBC count, *10 <sup>9</sup> /l      | 6.66(5.46,8.42)       | 7.93(6.11,10.03)      | <0.001 |
| Platelet count, *10 <sup>9</sup> /l | 155.50(127.50,188.00) | 185.00(140.50,223.50) | <0.001 |
| LVEF, %                             | 58(54,62)             | 56(43,61)             | <0.001 |

Continue Table S1

|                                    |                    |                    |        |
|------------------------------------|--------------------|--------------------|--------|
| SYNTAX score                       | 14.50(9.00,20.00)  | 16(9.63,23.00)     | 0.017  |
| Residual SYNTAX score              | 4(0,8)             | 4(1,9)             | 0.832  |
| AMI, n (%)                         | 109(34.9)          | 130(57.0)          | <0.001 |
| Diagnosis, n (%)                   |                    |                    | <0.001 |
| SAP                                | 52(16.7)           | 27(11.8)           |        |
| UA                                 | 151(48.4)          | 71(31.1)           |        |
| NSTEMI                             | 48(15.4)           | 69(30.3)           |        |
| STEMI                              | 61(19.6)           | 61(26.8)           |        |
| Angiographic data                  |                    |                    |        |
| LM, n (%)                          | 14(4.5)            | 10(4.4)            | 0.955  |
| MVD, n (%)                         | 222(71.2)          | 175(76.8)          | 0.145  |
| Calcified lesions, n (%)           | 46(14.9)           | 49(22.3)           | 0.030  |
| Thrombosis, n (%)                  | 34(11.0)           | 16(7.3)            | 0.145  |
| Long lesion, n (%)                 | 75(24.0)           | 47(20.6)           | 0.347  |
| CTO, n (%)                         | 58(18.8)           | 56(25.5)           | 0.068  |
| Number of stents                   | 1(1,2)             | 2(1,2)             | <0.001 |
| Length of stents, mm               | 32.00(20.00,52.00) | 38.00(23.00,58.25) | 0.006  |
| MACCEs, n (%)                      | 52(16.7)           | 64(28.1)           | 0.001  |
| All-cause death, n (%)             | 12(3.8)            | 23(10.1)           | 0.004  |
| Stroke, n (%)                      | 9(2.3)             | 14(6.1)            | 0.064  |
| Unplanned revascularization, n (%) | 31(10.3)           | 29(13.3)           | 0.362  |
| Recurrent MI, n (%)                | 8(2.6)             | 7(3.1)             | 0.724  |
| Cardiac death, n (%)               | 4(1.3)             | 12(5.3)            | 0.003  |

Data are presented as median (IQR) or n (%). BMI: body mass index; PCI: percutaneous coronary intervention; COPD: chronic obstructive pulmonary disease; SBP: systolic blood pressure; DBP: diastolic blood pressure; BNP: B-type natriuretic peptide; FBG: fasting blood glucose; HbA1C: glycosylated hemoglobin A1c; HDL-C: High-Density Lipoprotein Cholesterol, LDL-C: Low-Density Lipoprotein Cholesterol; Apo(A): Apolipoprotein A; Apo(B): Apolipoprotein B; AST: aspartate transaminase; ALT: alanine transaminase; PT: prothrombin time; INR: international normalized ratio; APTT: activated partial thromboplastin time; RBC count: red blood cell count; WBC count: white blood cell count; LVEF: left ventricular ejection fraction; AMI: acute myocardial infarction; SAP: stable angina pectoris, UA: unstable angina; NSTEMI: non-ST-segment elevation myocardial infarction; STEMI: ST-segment elevation myocardial infarction; LM: left main disease; MVD: multivessel disease; CTO: chronic total occlusion; MACCEs: major cardiovascular and cerebrovascular adverse events; MI: myocardial infarction.

**Table S2: Baseline characteristics according to fibrinogen level (Median (IQR))**

| Variables                          | Fibrinogen≤4.28g/l, n=389 | Fibrinogen>4.28g/l, n=151 | P      |
|------------------------------------|---------------------------|---------------------------|--------|
| Male, n (%)                        | 260(67.0)                 | 103(68.2)                 | 0.789  |
| Age, years                         | 69(61,76)                 | 68(61,77)                 | 0.859  |
| Hypertension, n (%)                | 290(74.6)                 | 111(73.5)                 | 0.804  |
| Previous PCI, n (%)                | 39(10)                    | 15(9.9)                   | 0.975  |
| Previous heart failure, n (%)      | 16(4.1)                   | 10(6.6)                   | 0.222  |
| COPD, n (%)                        | 11(2.8)                   | 4(2.6)                    | 0.910  |
| Previous stroke, n (%)             | 18(4.6)                   | 14(9.3)                   | 0.040  |
| Peripheral arterial disease, n (%) | 5(1.3)                    | 2(1.3)                    | 0.971  |
| Chronic kidney disease, n (%)      | 7(1.8)                    | 18(11.9)                  | <0.001 |
| Smoking, n (%)                     | 176(46.4)                 | 68(45.3)                  | 0.581  |
| SBP, mmHg                          | 133(121,149)              | 132.5(115,147)            | 0.235  |
| DBP, mmHg                          | 77(68,85)                 | 76(67.25,85.75)           | 0.728  |
| Heart rate, bpm                    | 78(68,86)                 | 82(71,94)                 | 0.006  |
| Troponin-T, pg/ml                  | 22.52(11.33,202.65)       | 182.30(28.66,1365.00)     | <0.001 |
| BNP, pg/ml                         | 81(34.00,219.00)          | 299.30(90.60,875.40)      | <0.001 |
| Creatinine, umol/l                 | 73.95(62.9089.98)         | 89.40(70.68,113.80)       | <0.001 |
| Uric acid, umol/l                  | 362.70(301.70,433.70)     | 393.00(286.68,476.70)     | 0.099  |
| Cystatin c, mg/l                   | 1.14(0.96,1.36)           | 1.45(1.13,2.00)           | <0.001 |
| FBG, mmol/l                        | 7.61(6.04,10.11)          | 8.43(6.67,12.56)          | 0.003  |
| HbA1c, mmol/l                      | 7.40(6.70,8.70)           | 8.00(6.60,9.30)           | 0.224  |
| Triglycerides, mmol/l              | 1.63(1.16,2.41)           | 1.52(1.12,2.27)           | 0.264  |
| Cholesterol, mmol/l                | 4.17(3.46,5.17)           | 4.39(3.59,5.08)           | 0.556  |
| HDL-C, mmol/l                      | 1.10(0.93,1.28)           | 1.06(0.87,1.29)           | 0.375  |
| LDL-C, mmol/l                      | 2.51(1.95,3.20)           | 2.63(2.07,3.20)           | 0.583  |

Continue Table S2

|                                     |                       |                       |        |
|-------------------------------------|-----------------------|-----------------------|--------|
| Residual cholesterol, mmol/l        | 0.54(0.36,0.79)       | 0.57(0.39,0.77)       | 0.623  |
| Lipoprotein(a), mg/l                | 81.80(44.50,215.70)   | 132.10(80.70,372.30)  | <0.001 |
| Apo(A), mmol/l                      | 1.23(1.07,1.39)       | 1.12(0.96,1.32)       | <0.001 |
| Apo(B), mmol/l                      | 0.80(0.61,1.04)       | 0.86(0.67,1.03)       | 0.246  |
| Homocysteine, umol/l                | 13.00(10.43,17.70)    | 14.10(11.20,19.90)    | 0.096  |
| Albumin, g/l                        | 40.20(37.30,42.70)    | 38.00(34.50,40.85)    | <0.001 |
| AST, IU/l                           | 24.30(17.90,43.80)    | 26.30(18.30,41.25)    | 0.611  |
| ALT, IU/l                           | 25.10(17.70,40.70)    | 26.20(16.00,40.75)    | 0.911  |
| Direct bilirubin, umol/l            | 2.59(1.97,3.54)       | 2.68(1.94,4.02)       | 0.707  |
| Indirect bilirubin, umol/l          | 9.77(7.47,12.72)      | 9.73(6.70,12.84)      | 0.341  |
| D-dimer, mg/l                       | 0.36(0.25,0.64)       | 0.64(0.38,1.01)       | <0.001 |
| PT, s                               | 13.40(12.50,16.70)    | 14.20(12.70,16.20)    | 0.434  |
| INR                                 | 0.94(0.91,1.00)       | 0.96(0.92,1.05)       | 0.009  |
| APTT, s                             | 37.10(34.40,40.13)    | 39.15(35.58,43.33)    | <0.001 |
| RBC count, *10 <sup>12</sup> /l     | 4.42(4.00,4.77)       | 4.18(3.71,4.53)       | <0.001 |
| Hemoglobin, g/l                     | 135.00(123.00,147.25) | 126.00(110.00,139.00) | <0.001 |
| WBC count, *10 <sup>9</sup> /l      | 6.74(5.48,8.60)       | 8.19(6.35,10.15)      | <0.001 |
| Platelet count, *10 <sup>9</sup> /l | 158.50(129.00,191.25) | 187.00(142.50,232.50) | <0.001 |
| LVEF, %                             | 58(53,62)             | 55(42,60)             | <0.001 |
| SYNTAX score                        | 14(8.13,20.00)        | 16(10,22.50)          | 0.004  |
| Residual SYNTAX score               | 4(0,8)                | 4(1,9)                | 0.620  |
| AMI, n%                             | 143(36.8)             | 96(63.6)              | <0.001 |
| Diagnosis, n%                       |                       |                       | <0.001 |
| SAP                                 | 66(17.0)              | 13(8.6)               |        |
| UA                                  | 180(46.3)             | 42(27.8)              |        |

Continue Table S2

|                                    |                    |                   |        |
|------------------------------------|--------------------|-------------------|--------|
| NSTEMI                             | 67(17.2)           | 50(33.1)          |        |
| STEMI                              | 76(19.5)           | 46(30.5)          |        |
| Angiographic data                  |                    |                   |        |
| LM, n (%)                          | 18(4.6)            | 6(4.0)            | 0.741  |
| MVD, n (%)                         | 277(71.2)          | 120(79.5)         | 0.051  |
| Calcified lesions, n (%)           | 65(17.0)           | 30(20.7)          | 0.321  |
| Thrombosis, n (%)                  | 40(10.4)           | 10(6.9)           | 0.214  |
| Long lesion, n (%)                 | 93(23.9)           | 29(19.2)          | 0.241  |
| CTO, n (%)                         | 77(20.1)           | 37(25.5)          | 0.177  |
| Number of stents                   | 1(1.2)             | 2(1.2)            | 0.018  |
| Length of stents, mm               | 33.00(20.00,52.50) | 38.00(23.0058,25) | 0.044  |
| MACCEs, n (%)                      | 67(17.2)           | 49(32.5)          | <0.001 |
| All-cause death, n (%)             | 16(4.1)            | 19(12.6)          | <0.001 |
| Stroke, n (%)                      | 12(3.1)            | 11(7.3)           | 0.030  |
| Unplanned revascularization, n (%) | 40(10.3)           | 20(13.3)          | 0.318  |
| Recurrent MI, n (%)                | 8(2.1)             | 7(4.6)            | 0.102  |
| Cardiac death, n (%)               | 6(1.5)             | 10(6.6)           | 0.002  |

Data are presented as median (IQR) or n (%). Abbreviations as shown in Table S1.

Table S3: Logistic regression analysis within the subgroup

| Variables | N   | Unadjusted OR(95%CI) | p     | Adjusted OR <sup>a</sup> (95%CI) | P     |
|-----------|-----|----------------------|-------|----------------------------------|-------|
| SAP       | 79  | 1.053(0.662-1.676)   | 0.826 | 1.352(0.681-2.686)               | 0.389 |
| ACS       | 416 | 1.170(1.014-1.351)   | 0.027 | 1.195(1.008-1.402)               | 0.031 |
| UA        | 222 | 1.393(1.004-1.791)   | 0.033 | 1.164(1.021-1.473)               | 0.042 |
| MI        | 239 | 1.064(0.904-1.254)   | 0.454 | 0.822(0.589-1.148)               | 0.251 |

<sup>a</sup>Adjusted covariates includes Chronic kidney disease(CKD), Heart rate, Troponin-T, B-type natriuretic peptide (BNP), Cystatin c, Residual cholesterol, Apolipoprotein B (Apo(B)), Albumin, Direct bilirubin, Indirect bilirubin, Fibrinogen, D-dimer, RBC count, Hemoglobin, left ventricular ejection fraction (LVEF). OR, Odds ratio; CI, confidence interval; N, number of patients. Other abbreviations are as in Table S1.

**Table S4: COX regression analysis within the subgroup**

| Variables                   | N   | Unadjusted HR(95%CI) | p      | Adjusted HR <sup>b</sup> (95%CI) | P      |
|-----------------------------|-----|----------------------|--------|----------------------------------|--------|
| <b>SAP</b>                  | 79  |                      |        |                                  |        |
| MACCEs                      | 15  | 1.052(0.651-1.699)   | 0.836  | 1.040(0.422-2.560)               | 0.932  |
| All-cause death             | 5   | 1.289(0.866-1.919)   | 0.212  | 2.245(0.640-7.876)               | 0.207  |
| Stroke                      | 3   | 0.923(0.278-3.063)   | 0.896  | 0.839(0.149-4.723)               | 0.843  |
| Unplanned revascularization | 8   | 0.538(0.173-1.669)   | 0.283  | 0.001(0.000-42.38)               | 0.205- |
| Recurrent MI                | 0   | -                    | -      | -                                | -      |
| Cardiac death               | 0   | -                    | -      | -                                | -      |
| <b>ACS</b>                  | 461 |                      |        |                                  |        |
| MACCEs                      | 101 | 1.148(1.029-1.280)   | 0.013  | 1.223(1.021-1.444)               | 0.029  |
| All-cause death             | 30  | 1.170(0.951-1.438)   | 0.137  | 1.06(0.823-1.366)                | 0.651  |
| Stroke, n (%)               | 20  | 1.163(0.920-1.471)   | 0.206  | 1.146(0.862-1.523)               | 0.349  |
| Unplanned revascularization | 53  | 1.118(0.954-1.311)   | 0.168  | 1.121(0.897-1.402)               | 0.315  |
| Recurrent MI                | 15  | 1.132(0.839-1.526)   | 0.418  | 1.030(0.645-1.645)               | 0.902  |
| Cardiac death               | 15  | 1.210(0.950-1.539)   | 0.122  | 1.121(0.803-1.566)               | 0.502  |
| <b>UA</b>                   | 222 |                      |        |                                  |        |
| MACCEs                      | 48  | 1.616(1.341-1.949)   | <0.001 | 1.638(1.318-2.036)               | <0.001 |
| All-cause death             | 12  | 1.679(1.223-2.303)   | 0.001  | 1.493(1.032-2.160)               | 0.033  |
| Stroke                      | 13  | 1.716(1.134-2.596)   | 0.011  | 1.732(0.959-3.129)               | 0.069  |
| Unplanned revascularization | 24  | 1.581(1.192-2.098)   | 0.001  | 1.692(1.226-2.334)               | 0.001  |
| Recurrent MI                | 5   | 0.566(0.137-2.335)   | 0.431  | 0.123(0.007-2.104)               | 0.148  |
| Cardiac death               | 7   | 1.608(1.121-2.307)   | 0.010  | 1.317(0.876-1.981)               | 0.186  |

Continue Table S4

| MI                          | 239 |                    |       |                    |       |  |
|-----------------------------|-----|--------------------|-------|--------------------|-------|--|
| MACCEs                      | 53  | 1.059(0.906-1.237) | 0.471 | 0.991(0.804-1.220) | 0.931 |  |
| All-cause death             | 18  | 1.038(0.726-1.413) | 0.814 | 0.816(0.528-1.261) | 0.360 |  |
| Stroke                      | 7   | 1.148(0.769-1.713) | 0.500 | 1.150(0.717-1.844) | 0.563 |  |
| Unplanned revascularization | 29  | 1.001(0.800-1.253) | 0.991 | 0.856(0.588-1.245) | 0.415 |  |
| Recurrent MI                | 10  | 1.096(0.785-1.531) | 0.589 | 0.967(0.514-1.819) | 0.918 |  |
| Cardiac death               | 8   | 1.100(0.769-1.574) | 0.602 | 1.013(0.603-1.700) | 0.961 |  |

<sup>b</sup>Adjusted covariates includes Chronic kidney disease(CKD), Age, Sex, Heart rate, Creatinine, Uric acid, Cystatin c, Lipoprotein(a), Homocysteine, aspartate transaminase(AST), alanine transaminase(ALT), Fibrinogen, D-dimer, left ventricular ejection fraction (LVEF), Syntax score, multivessel disease(MVD), Calcified lesions, chronic total occlusion(CTO). HR, hazard ratio; CI, confidence interval; N, number of patients. Other abbreviations are as in Table S1.

Table S5: The AUROC of fibrinogen predicted the mid/high SYNTAX score and clinical endpoints.

| Variables  | endpoint              | AUROC (95%CI)      | P      | endpoint                    | AUROC (95%CI)      | P     |
|------------|-----------------------|--------------------|--------|-----------------------------|--------------------|-------|
| <b>SAP</b> | Mid/high SYNTAX score | 0.572(0.405-0.739) | 0.465  |                             |                    |       |
|            | MACCEs                | 0.497(0.314-0.679) | 0.970  | All-cause death             | 0.668(0.395-0.940) | 0.212 |
|            | Stroke                | 0.566(0.294-0.837) | 0.700  | Cardiac death               | 0.923(0.864-0.982) | 0.148 |
|            | Recurrent MI          | -                  | -      | Unplanned revascularization | 0.382(0.149-0.615) | 0.276 |
| <b>ACS</b> | Mid/high SYNTAX score | 0.609(0.549-0.670) | 0.001  |                             |                    |       |
|            | MACCEs                | 0.609(0.551-0.667) | <0.001 | All-cause death             | 0.647(0.546-0.749) | 0.004 |
|            | Stroke                | 0.612(0.498-0.727) | 0.068  | Cardiac death               | 0.687(0.547-0.826) | 0.011 |
|            | Recurrent MI          | 0.572(0.427-0.718) | 0.340  | Unplanned revascularization | 0.552(0.481-0.623) | 0.186 |
| <b>UA</b>  | Mid/high SYNTAX score | 0.607(0.532-0.682) | 0.040  |                             |                    |       |
|            | MACCEs                | 0.686(0.604-0.768) | <0.001 | All-cause death             | 0.751(0.617-0.885) | 0.003 |
|            | Stroke                | 0.700(0.574-0.826) | 0.016  | Cardiac death               | 0.810(0.667-0.953) | 0.005 |
|            | Recurrent MI          | 0.417(0.315-0.518) | 0.524  | Unplanned revascularization | 0.591(0.476-0.705) | 0.146 |



|    |                       |                    |       |                             |                    |       |
|----|-----------------------|--------------------|-------|-----------------------------|--------------------|-------|
| MI | Mid/high SYNTAX score | 0.567(0.490-0.643) | 0.112 |                             |                    |       |
|    | MACCEs                | 0.581(0.494-0.668) | 0.072 | All-cause death             | 0.577(0.425-0.730) | 0.276 |
|    | Stroke                | 0.612(0.350-0.874) | 0.314 | Cardiac death               | 0.574(0.338-0.809) | 0.478 |
|    | Recurrent MI          | 0.600(0.434-0.766) | 0.284 | Unplanned revascularization | 0.542(0.449-0.634) | 0.467 |

AUROC, the area under the receiver operating characteristic curve; CI, confidence interval; Other abbreviations are as in Table S1.

## 2.1 Supplementary Figures

**Figure F1:** Kaplan-Meier survival analysis of the clinical endpoint.

Figure legend: (A): Kaplan-Meier survival analysis of all-cause death (log-rank:  $P < 0.01$ ). (B): Kaplan-Meier survival analysis of cardiac death (log-rank:  $P < 0.01$ ). (C): Kaplan-Meier survival analysis of stroke (log-rank:  $P < 0.05$ ). (D): Kaplan-Meier survival analysis of unplanned revascularization (log-rank:  $P > 0.05$ ). (E): Kaplan-Meier survival analysis of recurrent myocardial infarction (log-rank:  $P > 0.05$ ). MACCEs major adverse cardiovascular and cerebrovascular events.

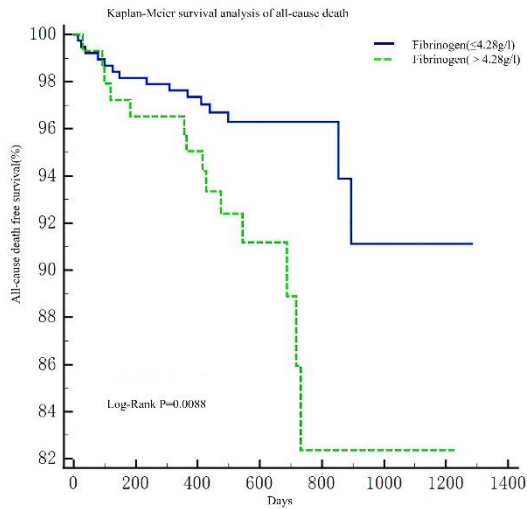

(A)

(A): Kaplan-Meier survival analysis of all-cause death (log-rank:  $P < 0.01$ ).

(B): Kaplan-Meier survival analysis of cardiac death (log-rank:  $P < 0.01$ ).

(C): Kaplan-Meier survival analysis of stroke (log-rank:  $P < 0.05$ ).

(D): Kaplan-Meier survival analysis of unplanned revascularization (log-rank:  $P > 0.05$ ).

(E): Kaplan-Meier survival analysis of recurrent myocardial infarction (log-rank:  $P > 0.05$ ).

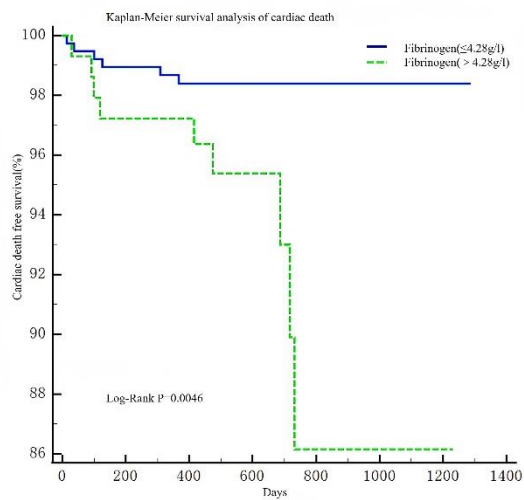

(B)

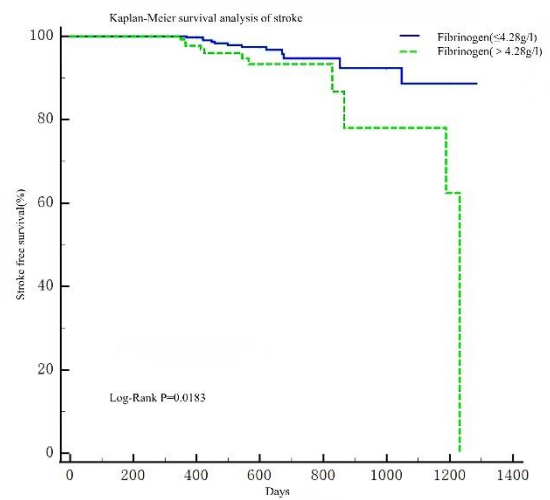

(C)

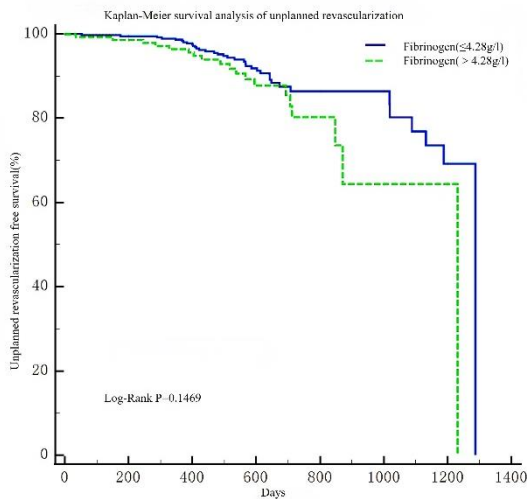

(D)

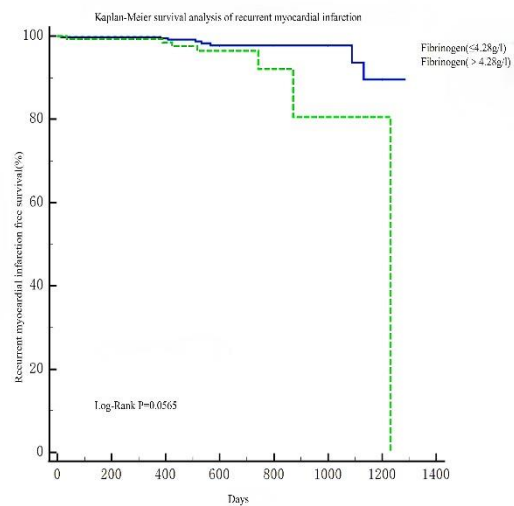

(E)
